# Supplementary material for: Analysis of flow boiling heat transfer characteristics in microchannels with hydrophilic/hydrophobic structured surfaces
Source: Research Square preprint supplement (doi:10.21203/rs.3.rs-8374362/v1), 2026-01-23
Supplement: Supplementary file 1 [file 59b3613f5796ad37c7d4bf65.docx]

Table

**Table 1.** Thermophysical properties of liquid and vapor water.

| Properties | Liquid phase | Vapor phase |
| --- | --- | --- |
| *ρ*/(kg/m3) | 1.0 × 103 | 0.5542 |
| *μ*/(kg/ms) | 3.0 ×10-4 | 1.343 ×10-5 |
| *λ*/(W/(mK)) | 6.0 × 10-4 | 2.61 × 10-2 |
| *c*p/(J/(kgK)) | 4.128 × 103 | 2.014 × 103 |
| *σ*/(N/m) | 5.9 × 10-2 | |
| *T*sat/K | 373.15 | |
| *h*/(J/kg) | 2.257 × 106 | |
